# Supplementary material for: Association Between Sugar-Sweetened Beverage Consumption as Meal Substitutes, Workload, and Obesity in Nurses: A Cross-Sectional Study
Source: PubMed Central journal article supplement (PMC6949918; doi:10.3390/ijerph16244984), 2019-12-07
Supplement: ijerph-16-04984-s001.pdf [file ijerph-16-04984-s001.pdf]

Supplementary Materials

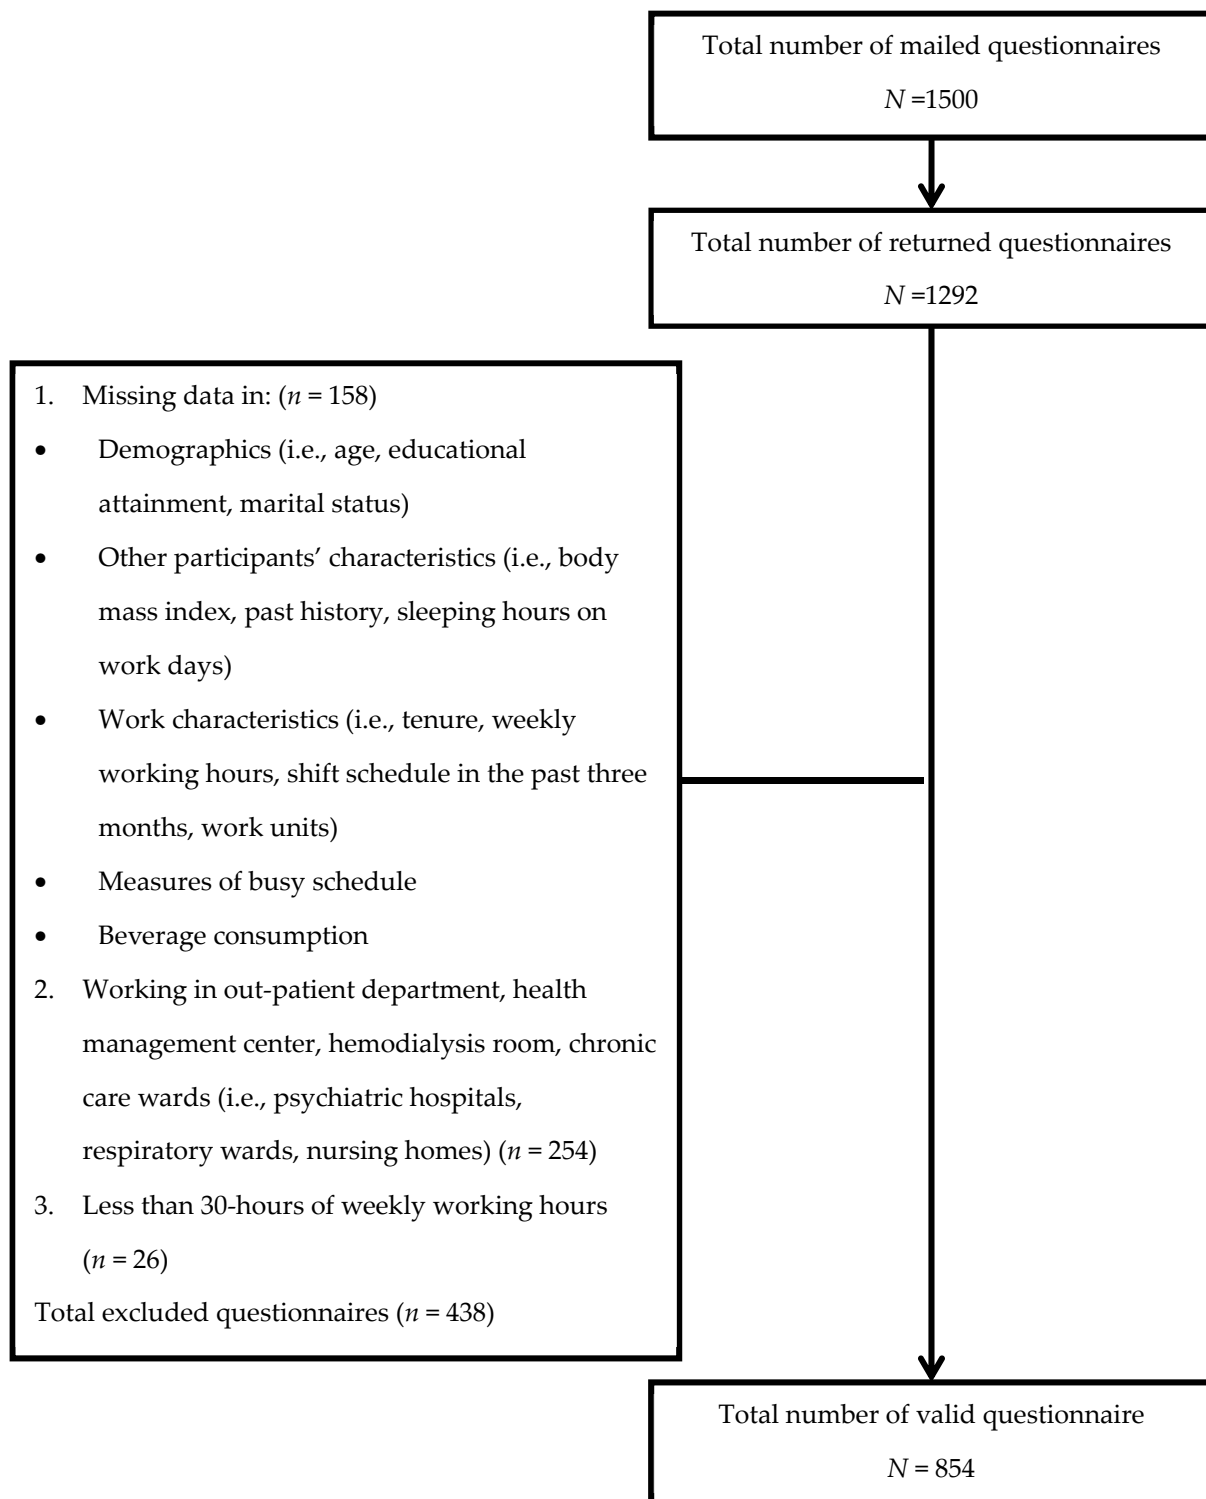

Figure S1. Process of data collection.
